# Supplementary material
Source: publisher figshare collection journal article supplement (https://wiley.figshare.com/articles/dataset/_/3521555)
Supplement: Supplementary file 1 [file 1]

15  
APPENDIX

Harmonious coexistence of hispine beetles on Heliconia in experimental  
and natural communities

Donald R. Strong, Jr.

ECOLOGY Vol. 63

## APPENDIX 1

Host species, sites and dates of samples. L = number of rolled leaves in sample. E = empty leaves = number of leaves in sample that contained no beetles of any species. C = complete leaves = number of leaves in sample that contained all species of beetles at that site.  $n_i$  = number of beetles of particular species in sample.  $e_i$  = number of leaves in sample that did not contain any individuals of that particular beetle species. Heliconia taxonomy from Daniels and Stiles (1979).

---



---

| No. leaves |   |   | $n_i$ | $e_i$ |
|------------|---|---|-------|-------|
| L          | E | C |       |       |

---

Heliconia wagneriana

## 1. Rincon, Osa Peninsula, C. R., XI, '72

21      8      0

C. vicina                      33      9C. puncticollis              1      20Ch. bicolor                      2      19

## 2. Finca La Selva, C. R., IX, '72

20      5      4

C. vicina                      38      5C. puncticollis              7      16

## 3. Hillsborough Reservoir, Tobago, VI, '73

48      27      5

X. monoceros                      13      30C. neglecta                      140      40

L       E       C           n<sub>i</sub>       e<sub>i</sub>

4. Arima, Trinidad, VI, '73

77       58       0

X. monoceros               16       69

C. neglecta               11       66

5. Arima, Trinidad, II, '70

101       45       10

X. monoceros               68       85

C. neglecta               19       51

6. Arima, Trinidad, VIII, '7

87       53       1

X. monoceros               43       79

C. neglecta               10       60

Heliconia platystachys

7. Ft. Clayton, C. Z., XII, '72 (sample 1)

27       4       0

C. vicina               84       12

C. puncticollis               10       23

C. nigripicta               16       17

C. instabilis               18       20

8. Ft. Clayton, C. Z., XII, '72 (sample 2)

29       2       0

C. vicina               196       3

C. puncticollis               22       16

C. nigripicta               3       27

C. instabilis               34       3

L      E      C            n<sub>i</sub>      e<sub>i</sub>

9. Ft. Clayton, C. Z., VII, '73

23      8      0

C. vicina                      31      10

C. puncticollis              4      20

C. instabilis                1      22

Ch. bicolor                  7      18

10. Bayano Reservoir, Panama, VII, '73

19      9      1

C. vicina                      10      10

C. puncticollis              1      18

Ch. bicolor                  4      15

Heliconia curtispatha

11. Rincon, Osa Peninsula, C. R., XII, '72

15      0      0

C. vicina                      26      6

C. puncticollis              13      9

C. curtispatha              232      3

Ch. bicolor                  1      14

C. instabilis                5      11

L E C n<sub>i</sub> e<sub>i</sub>Heliconia imbricata

## 12. Rincon, Osa Peninsula, C. R., XII, '72

55 28 1

C. vicina 12 50C. puncticollis 21 50C. consanguinea 89 32Ch. bicolor 6 49

## 13. Finca La Selva, C. R., V, '72

73 18 1

C. vicina 7 69C. puncticollis 13 65C. consanguinea 63 40Ch. perplexa 67 37

## 14. Finca La Selva, C. R., XII, '72

31 4 1

C. vicina 8 24C. puncticollis 16 20C. consanguinea 60 11Ch. perplexa 6 26

## 15. Finca La Selva, C. R., VIII, '73

7 0 2

C. vicina 8 4C. puncticollis 9 2C. consanguinea 16 3Ch. perplexa 6 1

L E C n<sub>i</sub> e<sub>i</sub>

16. Finca La Selva, C. R., VII, '75

28 6 1

C. vicina 11 24

C. consanguinea 87 7

Ch. perplexa 9 20

17. Finca La Selva, C. R., VII, '76

138 24 10

C. vicina 62 108

C. consanguinea 370 47

Ch. perplexa 141 68

18. Finca La Selva, C. R., II, '77

20 1 7

C. vicina 24 8

C. puncticollis 36 7

C. consanguinea 45 7

Ch. perplexa 39 5

19. Finca La Selva, C. R., VI, '77

50 9 0

C. vicina 26 37

C. puncticollis 1 49

C. consanguinea 96 16

Ch. perplexa 54 24

L E C       $u_i$      $e_i$

20. Finca La Selva, C. R., I, '78

51      4      8

|                        |     |    |
|------------------------|-----|----|
| <u>C. vicina</u>       | 22  | 33 |
| <u>C. puncticollis</u> | 87  | 19 |
| <u>C. consanguinea</u> | 146 | 19 |
| <u>Ch. perplexa</u>    | 92  | 17 |

Heliconia latispatha

21. Rincon, Osa Peninsula, C. R., VII, '71

12      0      0

|                        |    |    |
|------------------------|----|----|
| <u>C. vicina</u>       | 47 | 3  |
| <u>C. puncticollis</u> | 6  | 8  |
| <u>C. instabilis</u>   | 3  | 8  |
| <u>Ch. bicolor</u>     | 7  | 11 |

22. Rincon, Osa Peninsula, C. R., XII, '72

15      3      1

|                        |     |    |
|------------------------|-----|----|
| <u>C. vicina</u>       | 116 | 3  |
| <u>C. puncticollis</u> | 29  | 8  |
| <u>C. instabilis</u>   | 5   | 11 |
| <u>Ch. bicolor</u>     | 5   | 11 |

23. Barranca Forest,\* C. R., XII, '72

5      0      1

|                        |     |   |
|------------------------|-----|---|
| <u>C. vicina</u>       | 130 | 0 |
| <u>C. puncticollis</u> | 1   | 4 |

L      E      C            ni      ei

24. Tilaran, C. R., XII, '72 (sample 1)

10      0      8

C. vicina                      54      0

C. puncticollis            19      2

25. Tilaran, C. R., XII, '72 (sample 2)

3      0      2

C. vicina                      141      0

C. puncticollis            4      1

26. Tilaran, C. R., VII, '73

7      3      4

C. vicina                      11      3

27. Finca La Selva, C. R., XII, '72 (sample 1)

20      2      0

C. vicina                      83      2

C. puncticollis            6      17

C. nigripicta              8      15

Ch. perplexa              2      19

28. Finca La Selva, C. R., XII, '72 (sample 2)

20      0      0

C. vicina                      162      1

C. puncticollis            10      11

C. nigripicta              2      18

Ch. perplexa              9      12



L E C ni ei

## 29. Finca La Selva, C. R., XII, '72 (sample 3)

23 11 0

C. vicina 37 7C. puncticollis 2 22C. nigripicta 27 9

## 30. Finca La Selva, C. R., VIII, '73

6 2 1

C. vicina 23 2C. puncticollis 1 5

## 31. Ft. Clayton, C. Z., VII, '73

12 6 2

C. vicina 8 8C. puncticollis 7 8

## 32. Las Cruces Rd., C. Z., VII, '73

64 28 2

C. vicina 35 43C. puncticollis 19 30Ch. bicolor 18 50

## 33. Bayano Reservoir, Panama, VII, '73

21 9 0

C. vicina 7 14C. puncticollis 5 16Ch. bicolor 1 20

L      E      C      n<sub>i</sub>      e<sub>i</sub>

34. Finca La Selva, C. R., II, '77

32      5      0

C. vicina                      71      9

C. puncticollis              1      31

C. nigripicta                18      22

Ch. perplexa                3      29

35. Barranca Forest,\* C. R., II, '77

52      33      19

C. vicina                      67      33

36. Esquinas Forest,\*\* C. R., II, '77

37      9      0

C. vicina                      108      9

C. puncticollis              11      30

C. sp. nov.                    2      35

C. instabilis                2      36

37. Rio Claro Airstrip, Golfito, C. R., II, '77

30      12      18

C. vicina                      71      12

Heliconia mariae

38. Gatun Locks, C. Z., VII, '73

13      1      1

C. vicina                      5      10

C. puncticollis              4      10

N. separatus                46      2

L E C ni ei

Heliconia pogonantha

39. Finca La Selva, C. R., V, '72 (young plants)

24 15 0

C. vicina 12 18

C. ornatrix 5 20

C. nigripicta 3 22

40. Finca La Selva, C. R., V, '72 (sample 2)

28 8 1

C. puncticollis 1 27

C. ornatrix 17 21

N. separatus 26 12

41. Finca La Selva, C. R., XII, '72

20 7 0

C. vicina 2 19

C. puncticollis 2 18

C. ornatrix 24 10

N. separatus 14 12

42. Finca La Selva, C. R., VIII, '73

8 0 0

C. vicina 11 4

C. puncticollis 1 7

C. ornatrix 20 3

N. separatus 11 2

I. E C n<sub>i</sub> e<sub>i</sub>Heliconia irrasa var. undulata

43. Finca La Selva, C. R., XII, '72

44 16 6

C. vicina 61 19Ch. bicolor 12 35

44. Finca La Selva, C. R., VIII, '73

16 0 3

C. vicina 38 3Ch. bicolor 8 10Heliconia metallica

45. Bayano Reservoir, Panama, XII, '72 (sample 1)

37 15 0

C. vicina 67 18C. puncticollis 3 34C. nigripicta 2 35Ch. bicolor 1 36

46. Bayano Reservoir, Panama, XII, '72 (sample 2)

48 11 0

C. vicina 97 12C. puncticollis 6 42C. nigripicta 4 45

L      E      C            n<sub>i</sub>    e<sub>i</sub>

47. Bayano Reservoir, Panama, VII, '73

18      9      0

C. vicina                    6      14

C. puncticollis            1      17

Ch. bicolor                10     12

Heliconia osaensis

48. Barranca Forest,\* C. R., VII, '71

16      12      4

C. vicina                    12

L      E      C            n<sub>i</sub>    e<sub>i</sub>

49. Barranca Forest,\* C. R., III, '72

62      26      36

C. vicina                    97

50. Barranca Forest,\* C. R., II, '77

11      1      10

C. vicina                    46

51. Pipeline Road,\*\*\* C. Z., VII, '73

6      4      2

C. vicina                    3

L E C n<sub>i</sub> e<sub>i</sub>Heliconia vellerigera

52. Rincon, Osa Peninsula, C. R., VII, '71

7 0 7

|                        |     |   |
|------------------------|-----|---|
| <u>C. vicina</u>       | 19  | 3 |
| <u>C. puncticollis</u> | 7   | 4 |
| <u>C. curtispatha</u>  | 118 | 2 |
| <u>C. instabilis</u>   | 6   | 3 |
| <u>Ch. bicolor</u>     | 6   | 3 |

53. Golfito, II, '77

7 4 3

|                        |    |   |
|------------------------|----|---|
| <u>C. vicina</u>       | 12 | 6 |
| <u>C. puncticollis</u> | 13 | 5 |
| <u>C. curtispatha</u>  | 4  | 5 |

Experiments, Heliconia imbricata, Finca La Selva, VII, '76

54. Experiment C24

19 1 1

|                        |    |    |
|------------------------|----|----|
| <u>C. vicina</u>       | 4  | 15 |
| <u>C. consanguinea</u> | 11 | 1  |
| <u>Ch. perplexa</u>    | 77 | 14 |

55. Experiment P24

31 5 1

|                        |    |    |
|------------------------|----|----|
| <u>C. vicina</u>       | 1  | 30 |
| <u>C. consanguinea</u> | 11 | 28 |
| <u>Ch. perplexa</u>    | 70 | 5  |

L      E      C            n<sub>i</sub>      e<sub>i</sub>

56. Experiment C48

11      2      0

C. vicina                      1      10

C. consanguinea            48      3

Ch. perplexa                4      8

57. Experiment P48

25      1      0

C. vicina                      5      22

C. consanguinea            55      10

Ch. perplexa                62      2

\*Barranca Forest is a small plot of uncut forest on the southwest side of the InterAmerican highway, 1 km north of the road to Miramar. The road to Miramar intersects the InterAmerican highway approximately 4 km north of where the road to Puntarenas intersects the highway. This region is being modified rapidly and this plot will likely be cut down soon.

\*\*The Esquinas Forest is the site of Paul Allen's homestead (Allen, 1956), on the northwest side of the InterAmerican highway, 4 km north of the Rio Piedras Blancas. The Rio Piedras Blancas is 15 km north of the town of Rio Claro, which is where the road to Golfito intersects the highway.

\*\*\*Determination of this Heliconia population is in question. F. G. Stiles (pers. comm.) infers this species to be near H. vaginalis.
